# Supplementary material
Source: publisher figshare collection journal article supplement (https://acs.figshare.com/ndownloader/files/4581205)
Supplement: Supplementary file 1 [file 4581205]

# Bi- and Tri-nuclear Complexes of Group 4 Metal and Pd Bridged by OPPh<sub>2</sub> Groups: Synthesis and High Catalytic Activities in Double Hydrophosphinylation of 1-Octyne

*Tsutomu Mizuta, Chihiro Miyaji, Takafumi Katayama, Jun-ichi Ushio, Kazuyuki Kubo, and Katsuhiko  
Miyoshi*

Department of Chemistry, Graduate School of Science, Hiroshima University, 1-3-1 Kagamiyama,  
Higashi-Hiroshima 739-8526, Japan, fax: +81-82-424-0729, E-mail: mizuta@sci.hiroshima-u.ac.jp

## **Contents**

**Figures S1-S5.**

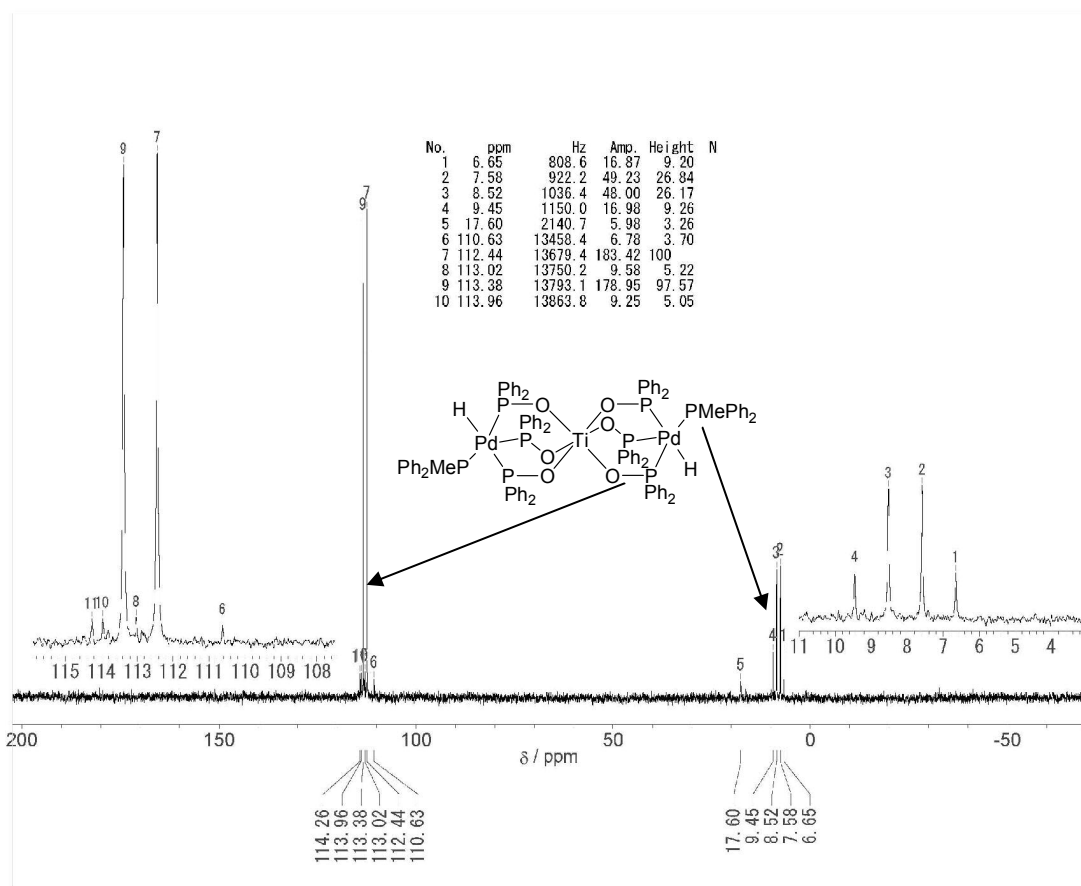

**Figure S1.**  $^{31}\text{P}\{^1\text{H}\}$  NMR spectrum of the Pd-Ti-Pd complex **6**.

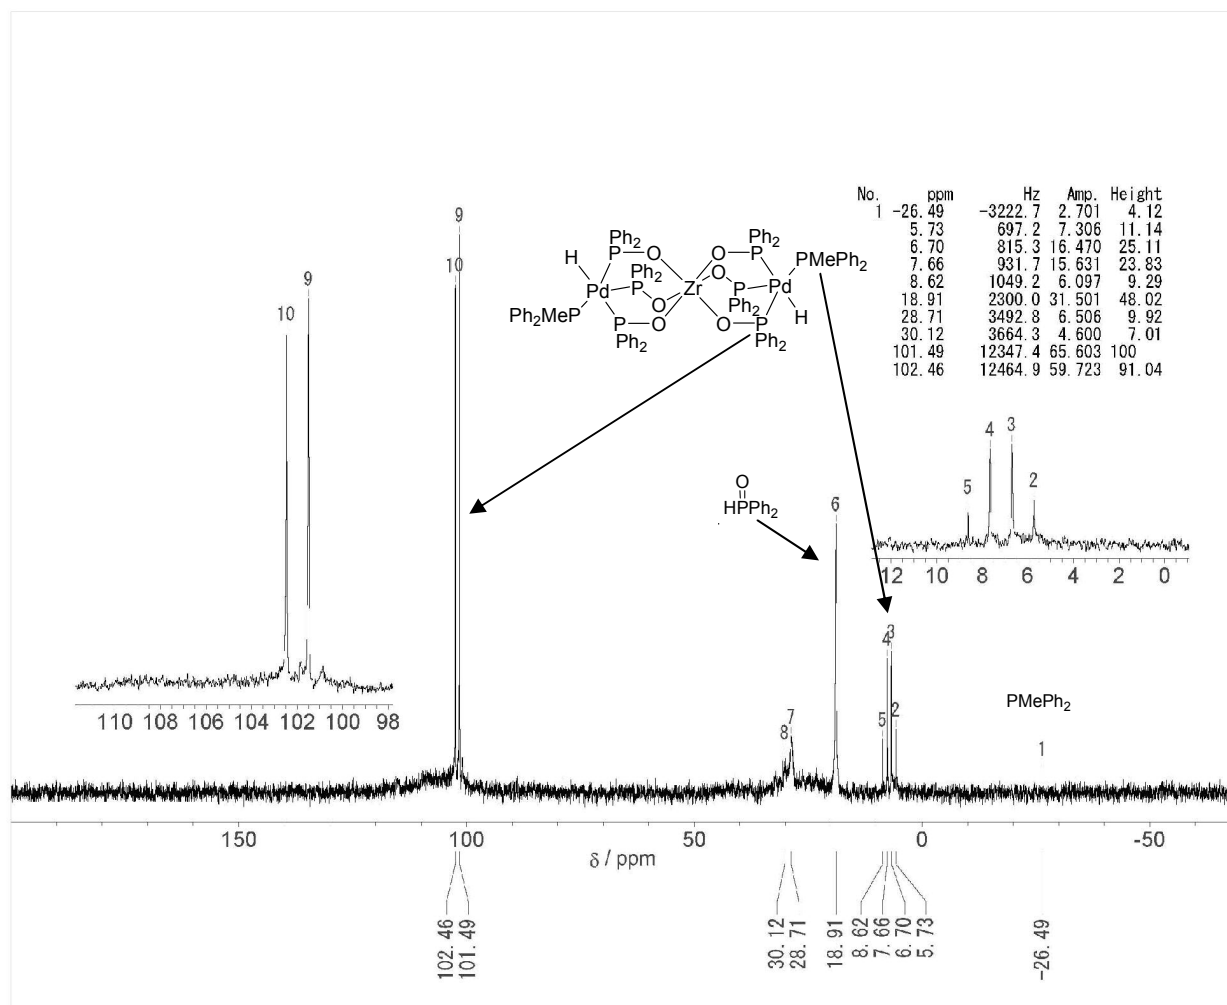

**Figure S2.**  $^{31}\text{P}\{^1\text{H}\}$  NMR spectrum of the reaction mixture obtained by the treatment of the Zr-Pd complex **2** with  $\text{HP}(\text{O})\text{Ph}_2$  and  $\text{PMePh}_2$ .

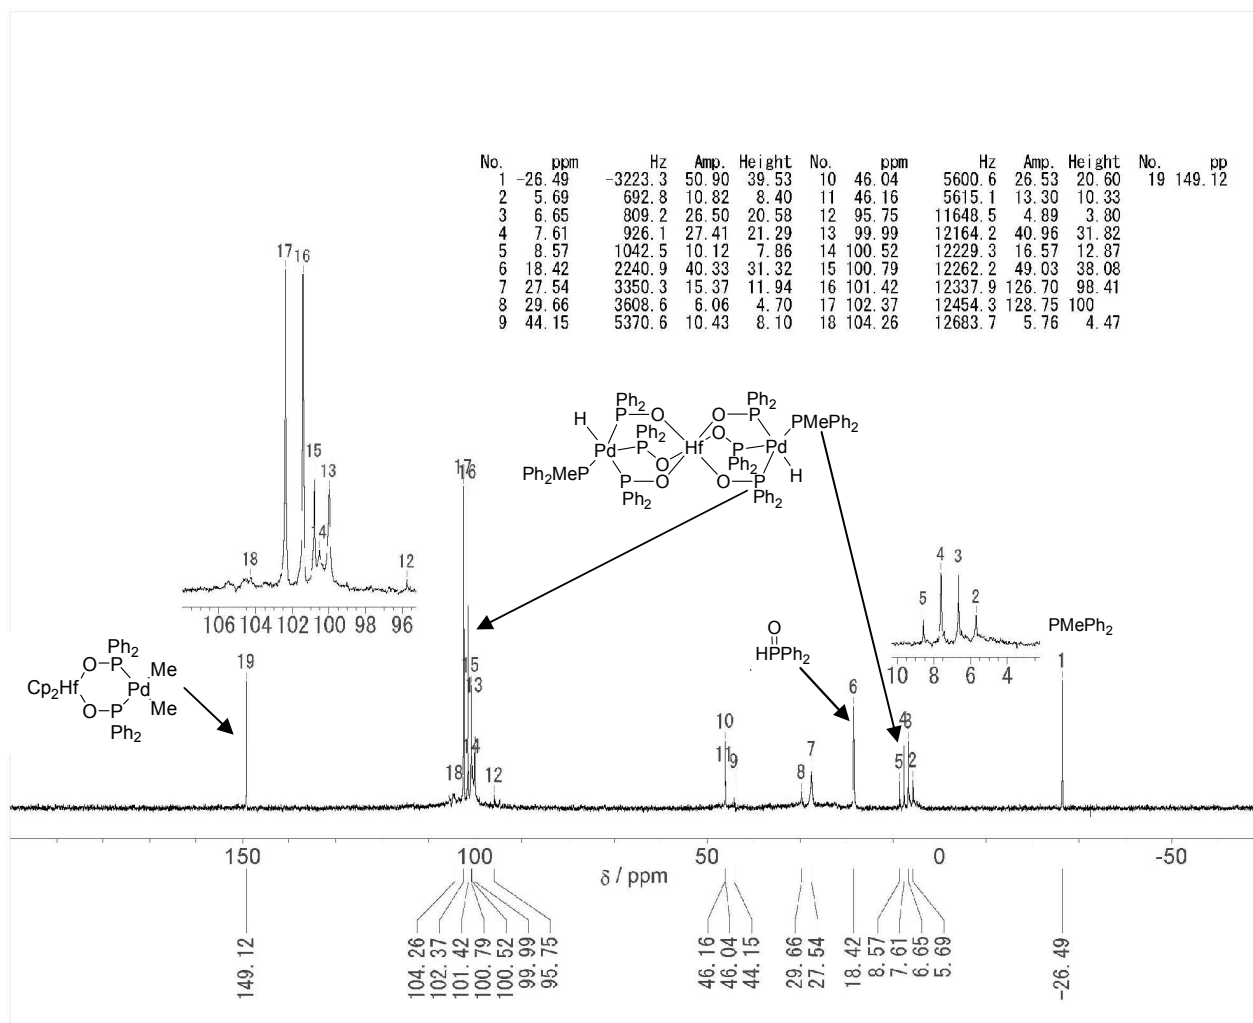

**Figure S3.**  $^{31}\text{P}\{^1\text{H}\}$  NMR spectrum of the reaction mixture obtained by the treatment of the Hf-Pd complex **3** with  $\text{HP}(\text{O})\text{Ph}_2$  and  $\text{PMePh}_2$ .

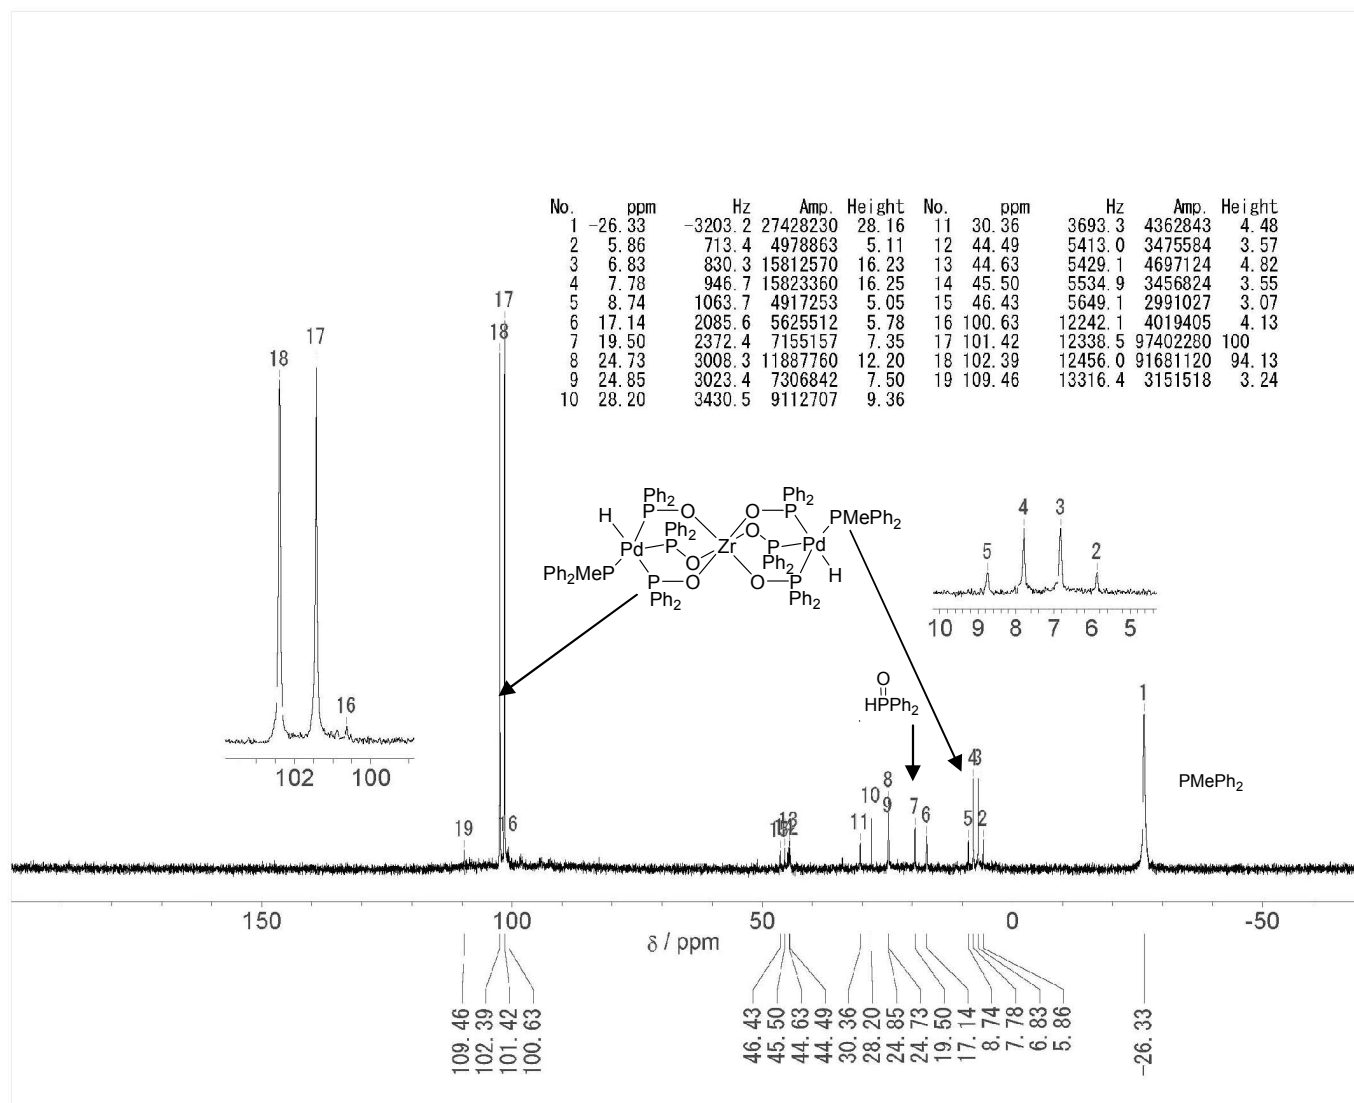

**Figure S4.**  $^{31}\text{P}\{^1\text{H}\}$  NMR spectrum of the reaction mixture obtained by the treatment of the  $\text{Cp}_2\text{ZrCl}_2$  and  $\text{PdMe}_2(\text{tmeda})$  with  $\text{HP}(\text{O})\text{Ph}_2$  and  $\text{PMePh}_2$ .
